# Supplementary material for: How Internet of Things responds to the COVID-19 pandemic
Source: PeerJ journal article supplement (doi:10.7717/peerj-cs.776), 2021-11-10

**COVID-19  
IoT Solutions**

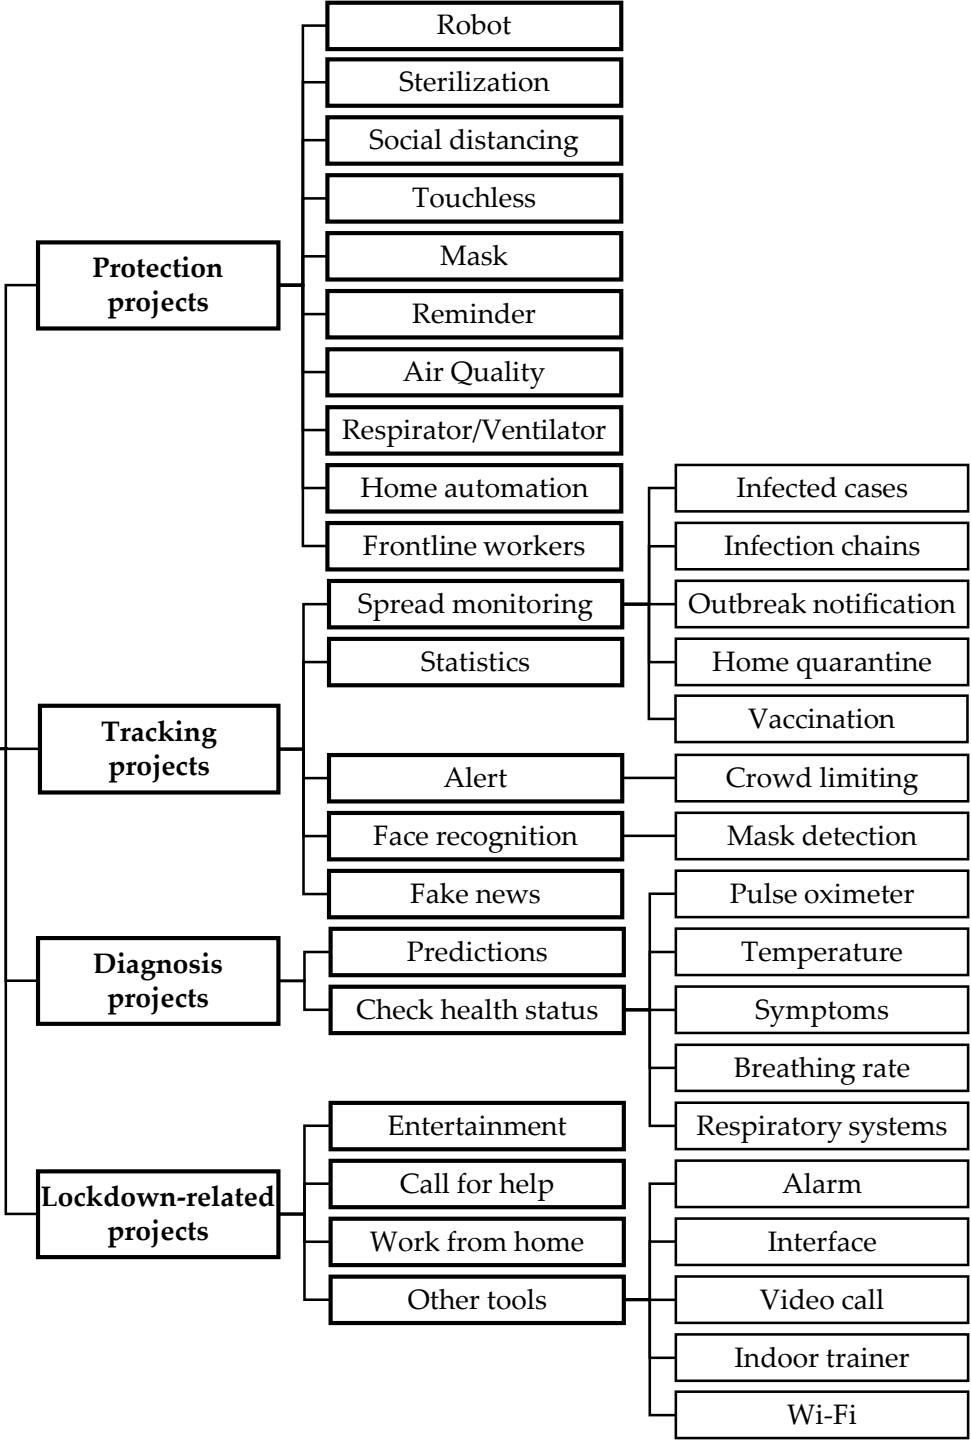

Supplement: Taxonomy_.pdf [file Taxonomy_.pdf]
